# Supplementary material for: Fear of falling and cognitive impairment in elderly with different social support levels: findings from a community survey in Central Vietnam
Source: Springer Nature journal article supplement (doi:10.1186/s12877-020-01533-8), 2020-04-16
Supplement: MOESM1 [file 17902388]

**Additional table 1:**

Fully adjusted model to determine the associations between participants' characteristics and the fear of falling

|                        |                            | Fear of falling           |
|------------------------|----------------------------|---------------------------|
|                        |                            | AOR <sup>1</sup> (95% CI) |
| Gender                 | Male                       | 1                         |
|                        | Female                     | 1.88 (1.20-2.95)**        |
| Age (yr)               | 60-69                      | 1                         |
|                        | 70-79                      | 1.28 (0.82-1.99)          |
|                        | ≥ 80                       | 1.60 (0.93-2.74)          |
| Marital status         | Married                    | 1                         |
|                        | Single or formerly married | 0.96 (0.61-1.51)          |
| History of fall        | No                         | 1                         |
|                        | Yes                        | 3.83 (1.75-8.38)**        |
| Arthritis              | No                         | 1                         |
|                        | Yes                        | 0.91 (0.60-1.37)          |
| Hypertension           | No                         | 1                         |
|                        | Yes                        | 1.33 (0.92-1.94)          |
| Limitation of the IADL | No                         | 1                         |
|                        | Yes                        | 2.49 (1.55-4.00)***       |
| Limitation of the BADL | No                         | 1                         |
|                        | Yes                        | 2.65 (1.44-4.88)**        |
| Visual ability         | No difficulty              | 1                         |
|                        | Difficulty                 | 1.60 (1.09-2.35)*         |
| Walking ability        | No difficulty              | 1                         |
|                        | Difficulty                 | 3.24 (2.04-5.16)***       |
| Cognitive function     | Normal                     | 1                         |
|                        | Impairment <sup>2</sup>    | 2.07 (1.19 –3.59)*        |

<sup>1</sup>AOR: Adjusted odd ratio; 95% CI = 95% Confidence interval

Adjusted for age, gender, marital status, history of fall, arthritis, hypertension, limitation of the IADL, limitation of the BADL, visual ability, walking ability and cognitive function.

<sup>2</sup> Cognitive impairment was defined by a score lower than the cut-off score of 23.

\*p &lt; 0.05; \*\*p &lt; 0.01; \*\*\*p &lt; 0.001
