# Supplementary material for: Fear of falling and cognitive impairment in elderly with different social support levels: findings from a community survey in Central Vietnam
Source: Springer Nature journal article supplement (doi:10.1186/s12877-020-01533-8), 2020-04-16
Supplement: MOESM2 [file 17902388]

**Additional table 2:**

Mean MMSE score of participants of low-moderate social support and high social support level

|                 | Low-moderate social support level (n = 423) | High social support level (n = 302) | p     | 95% CI |       |
|-----------------|---------------------------------------------|-------------------------------------|-------|--------|-------|
|                 |                                             |                                     |       | Lower  | Upper |
| MMSE mean score | 25.46                                       | 26.59                               | 0.003 | -1.90  | -0.38 |
